# Supplementary material for: Genetic Events Inhibiting Apoptosis in Diffuse Large B Cell Lymphoma
Source: MDPI journal article supplement (doi:10.3390/cancers13092167), 2021-04-30
Supplement: s1 [file s1]

**Table S1.** Ongoing clinical trials investigating therapies modulating apoptosis in DLBCL

| DLBCL type                                          | Investigational therapy                                                      | Trial phase | ClinicalTrials.gov Identifier |
|-----------------------------------------------------|------------------------------------------------------------------------------|-------------|-------------------------------|
| BCL2-positive DLBCL                                 | Venetoclax + polatuzumab vedotin + R-CHP                                     | Ib          | NCT04790903                   |
| Double hit / double expressor lymphoma              | Venetoclax + R-CHOP or DA-EPOCH-R                                            | II/III      | NCT03984448                   |
| DLBCL after ASCT                                    | Tislelizumab maintenance                                                     | III         | NCT04789434                   |
| EBV-positive DLBCL                                  | Sintilimab + R-CHOP                                                          | II          | NCT04181489                   |
| High-risk DLBCL                                     | Nivolumab + DA-EPOCH-R                                                       | II          | NCT03749018                   |
| Double/triple hit lymphoma                          | DA-EPOCH-R followed by nivolumab consolidation                               | II          | NCT03620578                   |
| DLBCL                                               | Sintilimab + R-CHOP                                                          | II          | NCT04023916                   |
| ABC-DLBCL                                           | Ibrutinib + R-CHOP followed by ibrutinib maintenance                         | II          | NCT03731234                   |
| High-risk DLBCL                                     | Ibrutinib + bortezomib + R-CHOP                                              | I/II        | NCT03129828                   |
| High-risk DLBCL                                     | Ibrutinib + R-CHOEP                                                          | II          | NCT03399513                   |
| DLBCL                                               | Ibrutinib + lenalidomide + chidamide + decitabine + R-CHOP                   | II          | NCT04025593                   |
| Non-GCB DLBCL                                       | Ibrutinib + CA-4948 (IRAK4 inhibitor, toll-like receptor pathway suppressor) | I           | NCT03328078                   |
| Double expressor DLBCL                              | Lenalidomide + R-CHOP                                                        | II          | NCT04842487                   |
| DLBCL (age > 75 and unfit for conventional therapy) | Lenalidomide + zanubrutinib + rituximab                                      | II          | NCT04460248                   |
| High-risk DLBCL                                     | Lenalidomide + tafasitamab + R-CHOP                                          | III         | NCT04824092                   |
| MYC-rearranged DLBCL                                | Lenalidomide + DA-EPOCH-R                                                    | I/II        | NCT04432714                   |
| DLBCL (age > 80)                                    | Lenalidomide + rituximab                                                     | II          | NCT04622579                   |
| DLBCL                                               | Lenalidomide + R-CHOP                                                        | II          | NCT04214626                   |
| Double expressor DLBCL                              | Lenalidomide + R-CHOP                                                        | II          | NCT04164368                   |
| Double hit lymphoma                                 | Lenalidomide + DA-EPOCH-R                                                    | I/II        | NCT02213913                   |
| DLBCL                                               | DLCL002 protocol                                                             | II          | NCT03837873                   |
| rrDLBCL + previously untreated DLBCL                | Tafasitamab + lenalidomide +/- R-CHOP (if previously untreated)              | I           | NCT04661007                   |
| rrDLBCL                                             | Venetoclax + R-ICE                                                           | I/II        | NCT03064867                   |
| rrDLBCL                                             | Venetoclax + selinexor                                                       | Ib          | NCT03955783                   |

|                  |                                                                                    |       |             |
|------------------|------------------------------------------------------------------------------------|-------|-------------|
| rrDLBCL          | Selinexor + various combinations including venetoclax, lenalidomide, and ibrutinib | I/II  | NCT04607772 |
| rrDLBCL          | ViPOR-P                                                                            | I     | NCT04739813 |
| rrDLBCL          | ViPOR                                                                              | Ib/II | NCT03223610 |
| rrDLBCL          | Venetoclax + lenalidomide + obinutuzumab                                           | I     | NCT02992522 |
| rrDLBCL          | Venetoclax + LOXO-305 (BTK inhibitor) +/- rituximab                                | I/II  | NCT03740529 |
| rrDLBCL          | Venetoclax + ABBV-621 (TRAIL receptor agonist)                                     | I     | NCT03082209 |
| rrDLBCL          | Anti-CD19 / CD20 CAR T cells                                                       | I     | NCT04215016 |
| rrDLBCL          | Anti-CD19 / CD20 CAR T cells                                                       | II    | NCT04792489 |
| rrDLBCL          | Anti-CD19 CAR T cells                                                              | I     | NCT03960840 |
| rrDLBCL          | Anti-CD19 CAR T cells + tislelizumab                                               | I     | NCT04381741 |
| rrDLBCL          | Anti-CD19 / CD20 CAR T cells                                                       | II    | NCT04844866 |
| rrDLBCL          | Anti-CD20 CAR T cells                                                              | I     | NCT04316624 |
| rrDLBCL          | Anti-CD19 / CD22 CAR T cells                                                       | I/II  | NCT03287817 |
| rrDLBCL          | Apamistamab followed by anti-CD20 CAR T cells                                      | I     | NCT04512716 |
| rrDLBCL          | Anti-CD19 / CD20 CAR T cells                                                       | I     | NCT04486872 |
| Refractory DLBCL | Anti-CD19 CAR T cells                                                              | I     | NCT04812691 |
| rrDLBCL          | Anti-CD22 CAR T cells                                                              | I     | NCT04088890 |
| rrDLBCL          | Anti-CD30 CAR T cells                                                              | I     | NCT04526834 |
| rrDLBCL          | Anti-CD19 CAR T cells                                                              | I     | NCT03720457 |
| rrDLBCL          | Anti-CD20 CAR T cells                                                              | I     | NCT04176913 |
| rrDLBCL          | Anti-CD19 CAR T cells                                                              | I     | NCT04026100 |
| rrDLBCL          | Anti-CD19 CAR T cells                                                              | II    | NCT04089215 |
| rrDLBCL          | Anti-CD19 CAR T cells + acalabrutinib                                              | I/II  | NCT04257578 |
| rrDLBCL          | Anti-CD19 CAR T cells + cyclophosphamide + fludarabine                             | I     | NCT04049513 |
| rrDLBCL          | Anti-CD19 CAR T cells                                                              | I     | NCT04464200 |
| rrDLBCL          | Anti-CD19 / CD22 CAR T cells                                                       | I     | NCT03233854 |
| rrDLBCL          | Anti-CD19 / CD20 CAR T cells + cyclophosphamide + fludarabine                      | I     | NCT04007029 |
| rrDLBCL          | Anti-CD19 CAR T cells                                                              | I     | NCT04844086 |

|                                               |                                                                                            |      |             |
|-----------------------------------------------|--------------------------------------------------------------------------------------------|------|-------------|
| rrDLBCL                                       | Anti-CD19 CAR T cells                                                                      | I    | NCT03103971 |
| rrDLBCL                                       | Anti-CD19 CAR T cells + cyclophosphamide + fludarabine                                     | I/II | NCT03676504 |
| rrDLBCL                                       | Anti-CD20 CAR T cells + cyclophosphamide +/- fludarabine                                   | I/II | NCT03277729 |
| rrDLBCL                                       | Anti-CD5 CAR T cells + cyclophosphamide +/- fludarabine                                    | I    | NCT04767308 |
| rrDLBCL                                       | Anti-CD19 CAR T cells + cyclophosphamide + fludarabine                                     | I    | NCT04545762 |
| rrDLBCL                                       | Anti-CD19 CAR T cells                                                                      | I    | NCT04231747 |
| rrDLBCL                                       | Anti-CD19 CAR T cells + cyclophosphamide + fludarabine                                     | I/II | NCT04836507 |
| rrDLBCL after HSCT                            | Anti-CD19 CAR T cells + cyclophosphamide + fludarabine                                     | I    | NCT03579888 |
| rrDLBCL                                       | Anti-CD19 CAR T cells + SWI019 (anti-CD19 antibody)                                        | I    | NCT04450069 |
| rrDLBCL                                       | Anti-CD19 CAR T cells                                                                      | I    | NCT02631044 |
| rrDLBCL                                       | Anti-CD19 CAR T cells + durvalumab                                                         | Ib   | NCT02706405 |
| rrDLBCL                                       | Anti-CD19 CAR T cells + pembrolizumab                                                      | I    | NCT03630159 |
| rrDLBCL                                       | Anti-CD20 CAR T cells+ cyclophosphamide + fludarabine + bendamustine                       | I    | NCT04735471 |
| rrDLBCL                                       | Anti-CD19 CAR T cells +/- platinum-based immunochemotherapy + lymphodepleting chemotherapy | III  | NCT03570892 |
| rrDLBCL after CAR T cell therapy              | Glofitamab + obinutuzumab                                                                  | II   | NCT04703686 |
| rrDLBCL                                       | Blinatumomab + lenalidomide                                                                | I    | NCT02568553 |
| rrDLBCL after ASCT                            | Tislelizumab maintenance                                                                   | III  | NCT04799314 |
| rrDLBCL                                       | Sintilimab + R-GemOx                                                                       | II   | NCT04659434 |
| rrDLBCL                                       | Nivolumab + tumor associated antigen specific T cells (TAA-T)                              | I    | NCT03843294 |
| rrDLBCL                                       | Toripalimab + rituximab                                                                    | II   | NCT04425824 |
| rrDLBCL                                       | Pembrolizumab + CXD101 (histone deacetylase inhibitor)                                     | I/II | NCT03873025 |
| EBV-positive rrDLBCL                          | Tislelizumab + zanubrutinib                                                                | II   | NCT04705129 |
| Richter's transformation (previously treated) | Nivolumab + copanlisib                                                                     | I    | NCT03884998 |

|                            |                                                      |       |             |
|----------------------------|------------------------------------------------------|-------|-------------|
| rrDLBCL                    | Pembrolizumab + dendritic cell therapy + cryosurgery | I/II  | NCT03035331 |
| PD-L1 gene-altered rrDLBCL | Pembrolizumab                                        | II    | NCT03990961 |
| rrDLBCL                    | STI-3031 (anti-PD-L1 antibody)                       | II    | NCT03999658 |
| rrDLBCL                    | Durvalumab + radiotherapy                            | I     | NCT03610061 |
| rrDLBCL                    | Ibrutinib + R-ICE                                    | II    | NCT02955628 |
| Non-GCB rrDLBCL            | Ibrutinib + abexinostat                              | I     | NCT03939182 |
| rrABC-DLBCL                | Ibrutinib + ASCT                                     | III   | NCT02443077 |
| rrDLBCL                    | Ibrutinib + loncastuximab tesirine                   | I/II  | NCT03684694 |
| rrDLBCL                    | Ibrutinib + bendamustine + rituximab                 | II    | NCT02747732 |
| rrDLBCL                    | Ibrutinib + selinexor                                | I     | NCT02303392 |
| rrDLBCL                    | Ibrutinib + pevonedistat                             | I     | NCT03479268 |
| rrDLBCL                    | Lenalidomide + rituximab + brentuximab vedotin       | III   | NCT04404283 |
| rrDLBCL                    | Lenalidomide + tislezumab                            | Ib/II | NCT04796857 |
| rrDLBCL (age > 75)         | Lenalidomide + rituximab                             | II    | NCT04113226 |
| rrDLBCL                    | Lenalidomide + zanubrutinib +/- rituximab            | I     | NCT04436107 |
| rrDLBCL                    | Lenalidomide + R-ICE                                 | I/II  | NCT02628405 |
| rrDLBCL                    | Lenalidomide + pembrolizumab + rituximab             | II    | NCT02446457 |
| rrDLBCL                    | Lenalidomide + nivolumab                             | I/II  | NCT03015896 |
| rrDLBCL                    | NX-2127 (BTK degrader)                               | I     | NCT04830137 |

Data obtained from Clinicaltrials.gov

R-CHP: rituximab, cyclophosphamide, doxorubicin, prednisone

R-CHOP: rituximab, cyclophosphamide, doxorubicin, vincristine, prednisone

DA-EPOCH-R: dose-adjusted etoposide, prednisone, vincristine, cyclophosphamide, doxorubicin, rituximab

ASCT: autologous stem cell transplant

R-CHOEP: rituximab, cyclophosphamide, doxorubicin, vincristine, etoposide, prednisone

R-ICE: rituximab, ifosfamide, carboplatin, etoposide

HSCT: hematopoietic stem cell transplant

R-GemOx: rituximab, gemcitabine, oxaliplatin

ViPOR-P: venetoclax, ibrutinib, prednisone, obinutuzumab, lenalidomide, polatuzumab vedotin
